# Supplementary material for: Overwintering Camelina and Canola/Rapeseed Show Promise for Improving Integrated Weed Management Approaches in the Upper Midwestern U.S.
Source: MDPI journal article supplement (doi:10.3390/plants12061329), 2023-03-15

Supplemental Figure S1: Neighbor-joining tree for 58 overwintered winter canola/rapeseed accessions

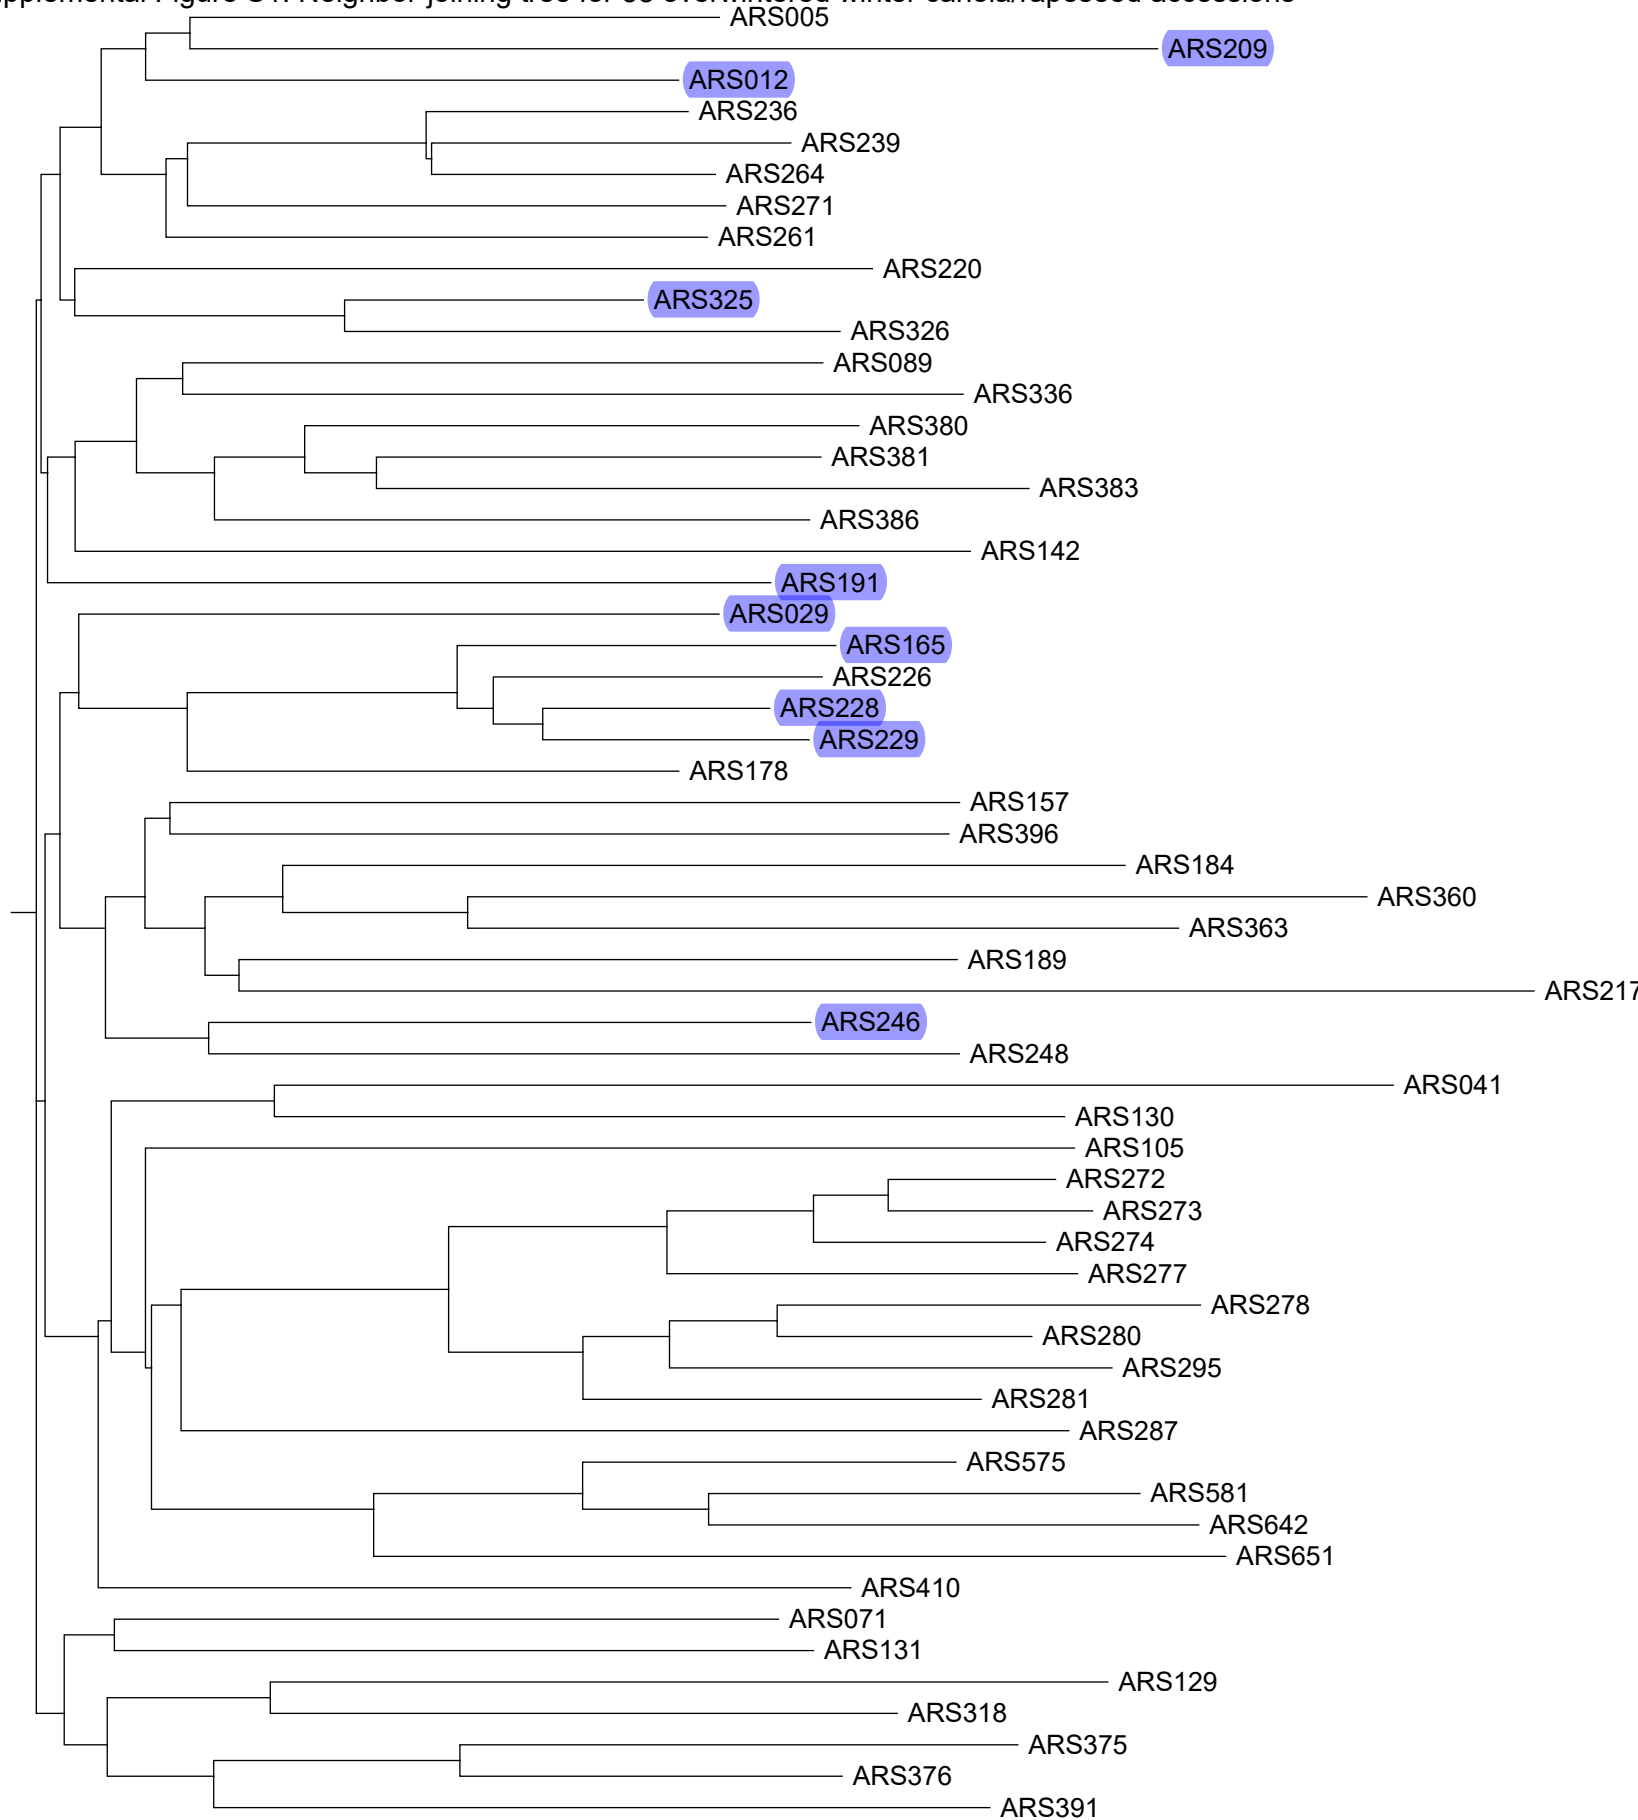

Supplement: s1 [file s1]
